# Supplementary material for: Preparation of superhydrophobic cauliflower-like silica nanospheres with tunable water adhesion
Source: Royal Society of Chemistry journal article supplement (doi:10.1039/c1jm10283d), 2011-01-01
Supplement: c1jm10283d.pdf [file c1jm10283d.pdf]

Electronic Supplementary Information for

# Preparation of Superhydrophobic Cauliflower-like Silica Nanospheres with Tunable Water Adhesion

*Min Wang<sup>a,b</sup>, Chen Chen<sup>a</sup>, Jiping Ma<sup>a,b</sup> and Jie Xu<sup>a</sup> \**

<sup>a</sup>State Key Laboratory of Catalysis, Dalian Institute of Chemical Physics, Chinese Academy of Sciences, Dalian 116023

( P.R. China)

<sup>b</sup>Graduate University of Chinese Academy of Sciences, Beijing 100049 (P.R. China)

\*Corresponding author: E-mail: [xujie@dicp.ac.cn](mailto:xujie@dicp.ac.cn)

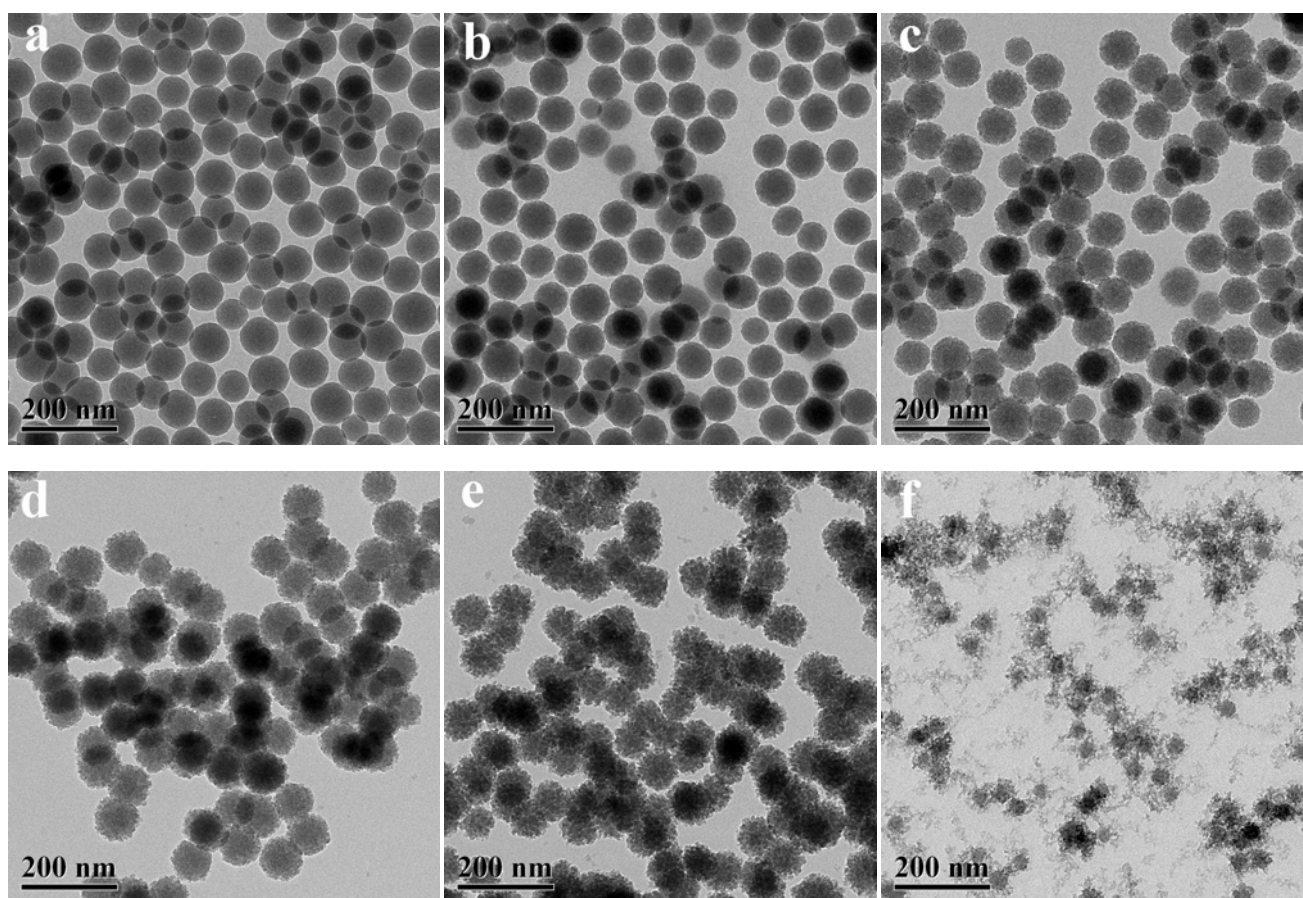

Fig. S1 TEM images of the silica nanospheres with different amount of phenyl groups. a) Ph-0-TE, b) Ph-5-TE, c) Ph-10-TE, d) Ph-15-TE, e) Ph-20-TE, and f) Ph-20-TM.

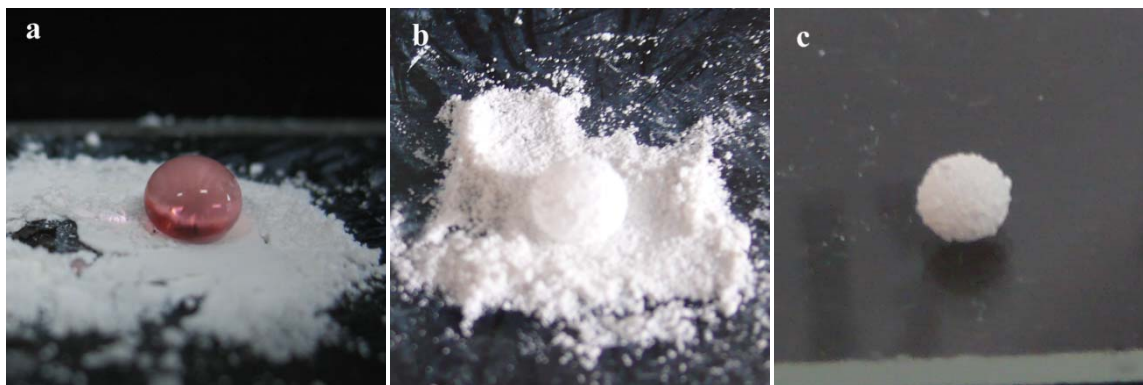

**Figure S2.** 50 $\mu$ L colored water droplet rest on the sticky superhydrophobic materials (a), water droplet was coated with a lay of the sticky materials through rolling over the Ph-20-TM materials powder (b) and the coated water droplet rest on the hydrophilic glass flake (c).
